# Supplementary material for: Highly Pathogenic H5 Influenza Viruses Isolated between 2016 and 2017 in Vietnamese Live Bird Markets
Source: MDPI journal article supplement (doi:10.3390/v15051093), 2023-04-29
Supplement: s1 [file s1]

**Figure S1. Maximum-likelihood (ML) phylogeny of N1 NA genes.** Viruses isolated in this study are shown in purple (clade 2.3.2.1c) and red (clade 2.3.4.4f). Bootstrap values greater than 80% are indicated at the nodes. The scale bar represents the nucleotide substitution rate at each site.

**Figure S2. Maximum-likelihood (ML) phylogeny of N6 NA genes.** Viruses isolated in this study are shown in purple (clade 2.3.2.1c), red (clade 2.3.4.4f), and blue (clade 2.3.4.4g). Bootstrap values greater than 80% are indicated at the nodes. The scale bar represents the nucleotide substitution rate at each site.

**Figure S3. Maximum-likelihood (ML) phylogeny of PB2 genes.** Viruses isolated in this study are shown in purple (clade 2.3.2.1c), red (clade 2.3.4.4f), and blue (clade 2.3.4.4g). Bootstrap values greater than 80% are indicated at the nodes. The scale bar represents the nucleotide substitution rate at each site.

**Figure S4. Maximum-likelihood (ML) phylogeny of NS1 genes.** Viruses isolated in this study are shown in purple (clade 2.3.2.1c), red (clade 2.3.4.4f), and blue (clade 2.3.4.4g). Bootstrap values greater than 80% are indicated at the nodes. The scale bar represents the nucleotide substitution rate at each site.
