# Supplementary figures and images for: Highly Pathogenic H5 Influenza Viruses Isolated between 2016 and 2017 in Vietnamese Live Bird Markets
Source: MDPI journal article supplement (doi:10.3390/v15051093), 2023-04-29

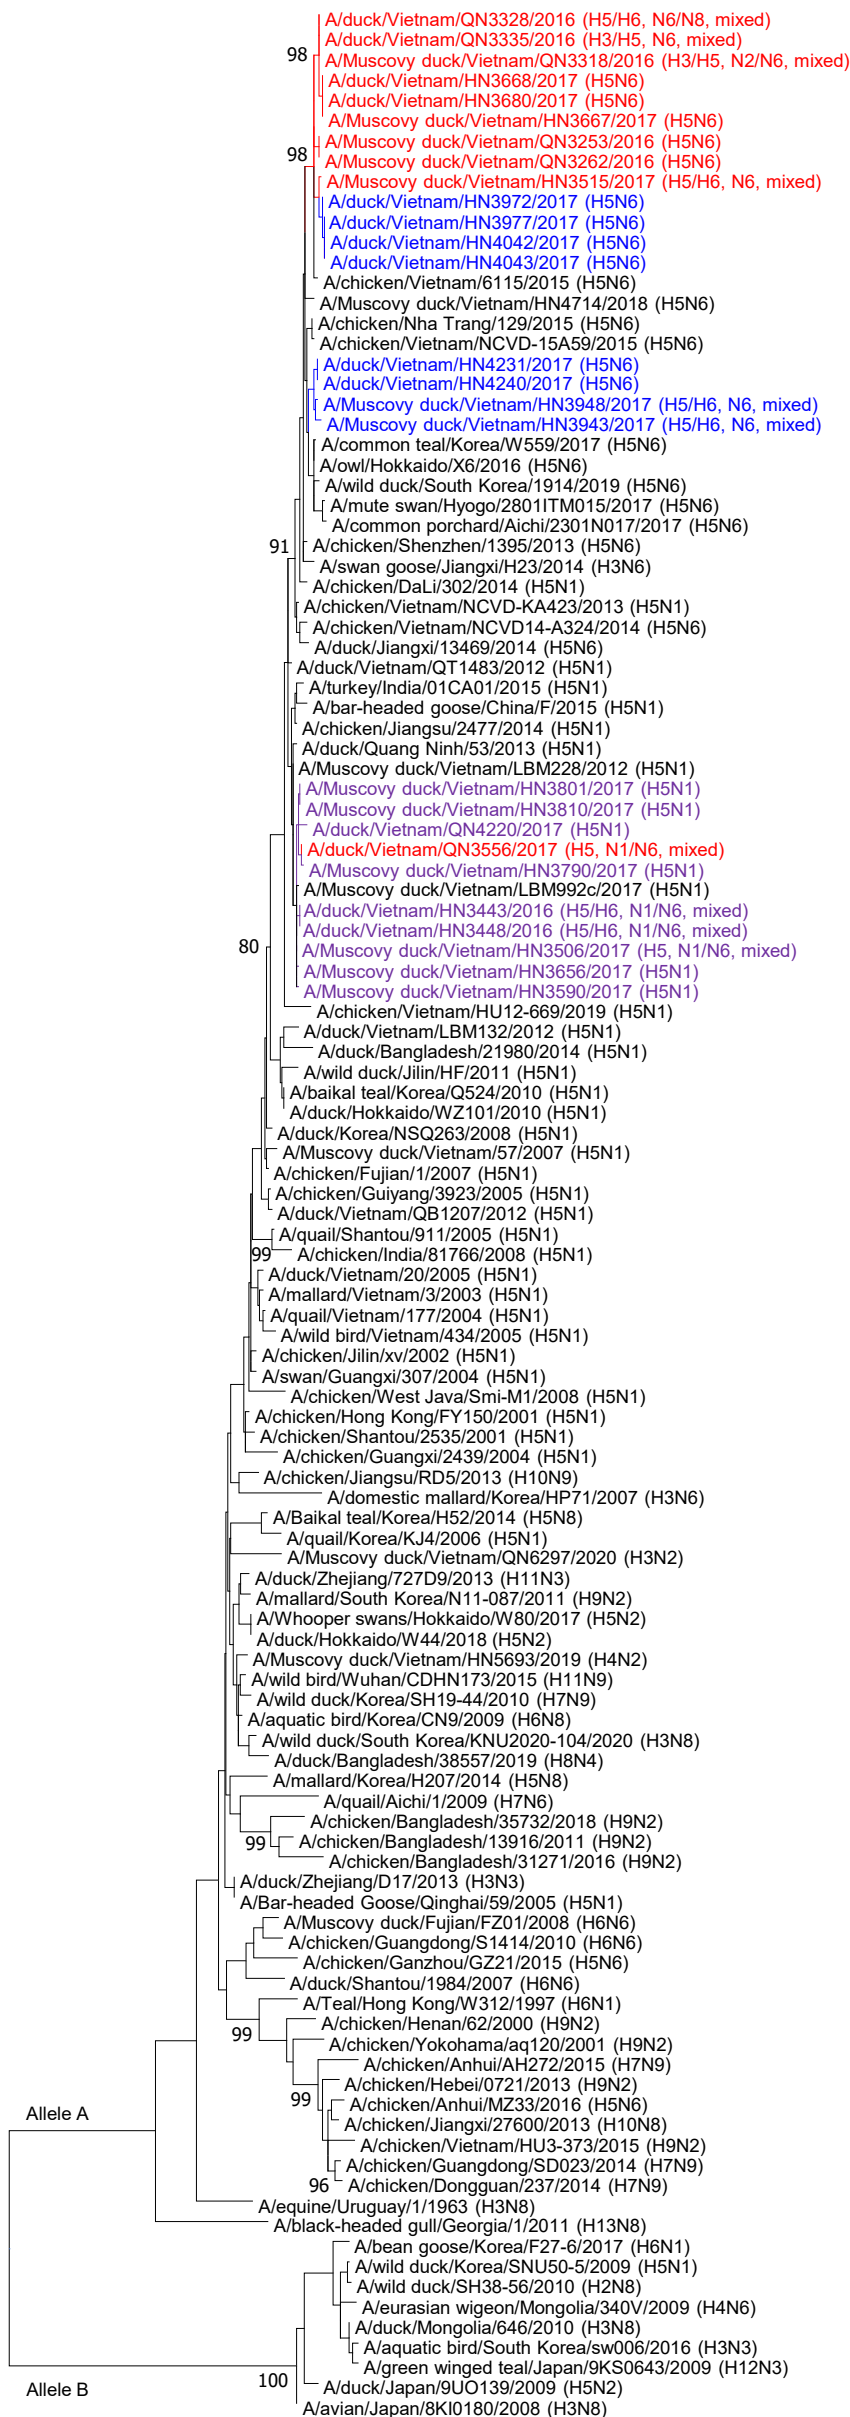

Supplement: s1 [file s1]

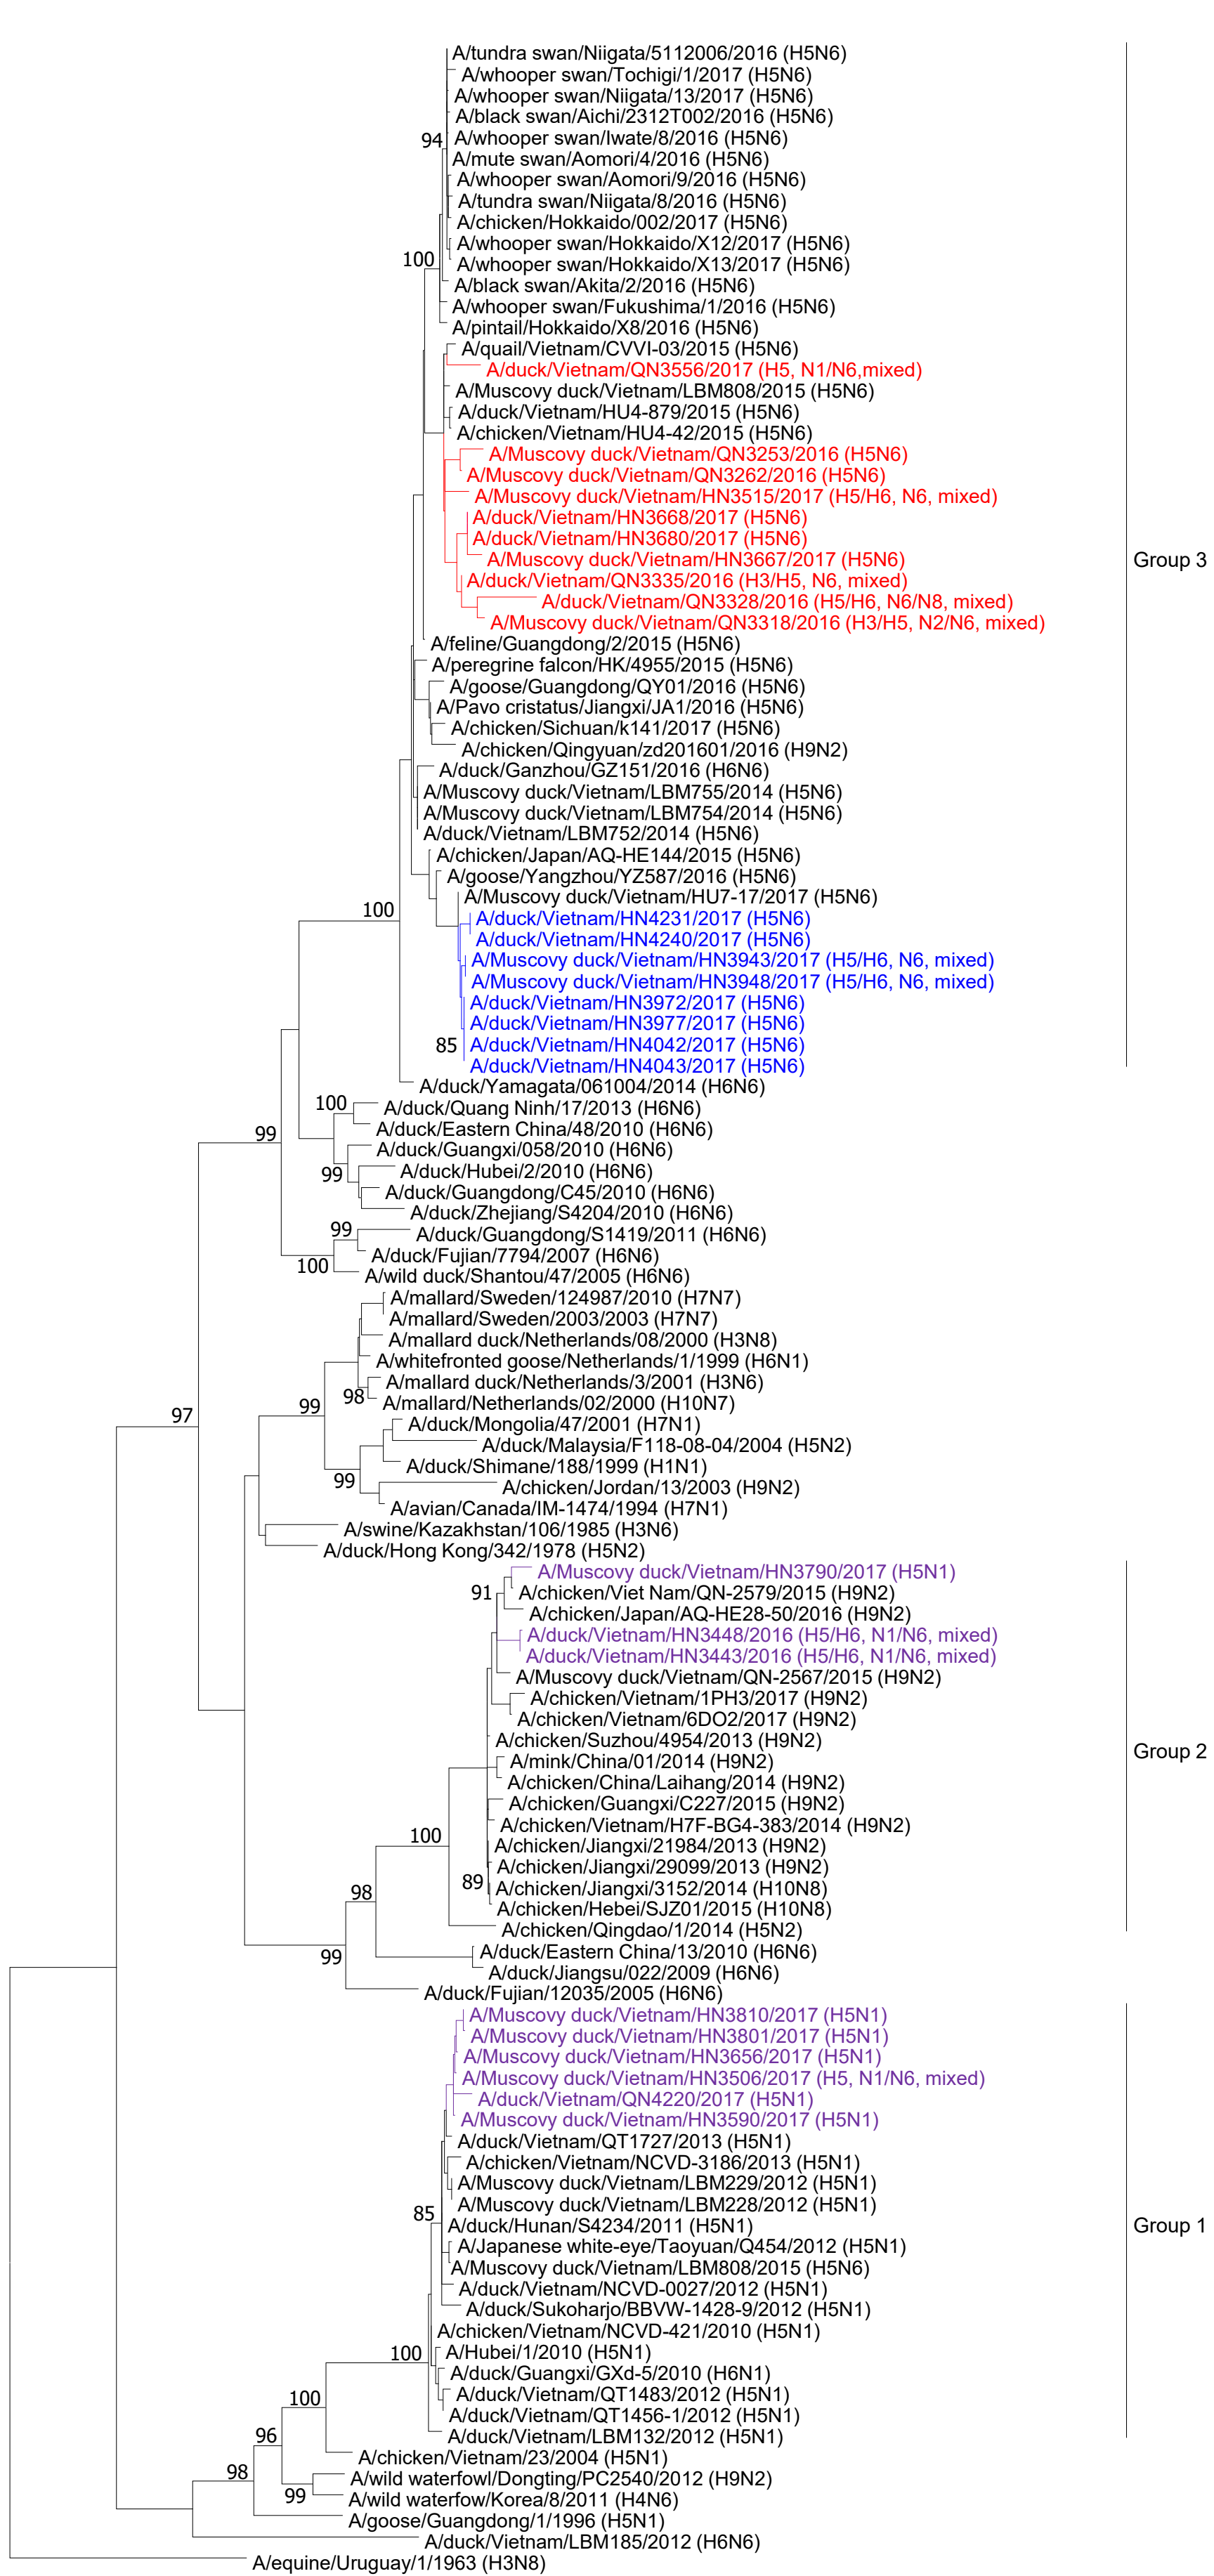

Group 3

Group 2

Group 1

0.01

Supplement: s1 [file s1]

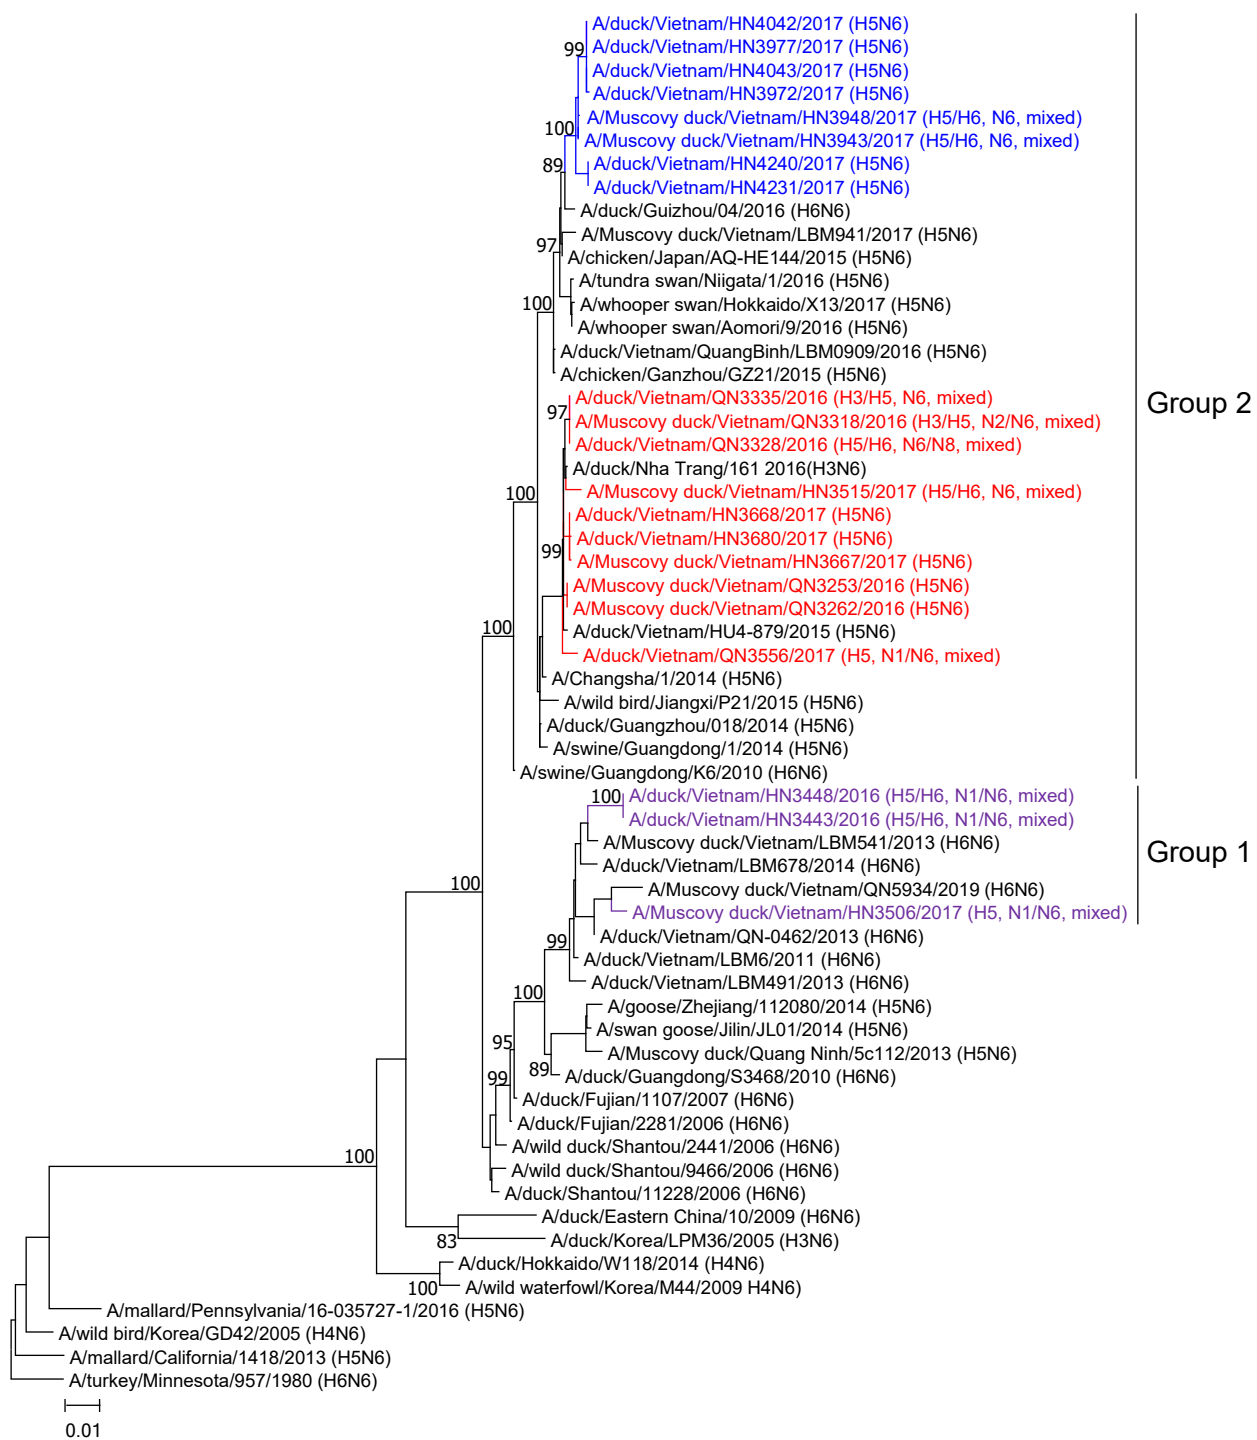

Figure S2. N6 NA gene

Supplement: s1 [file s1]

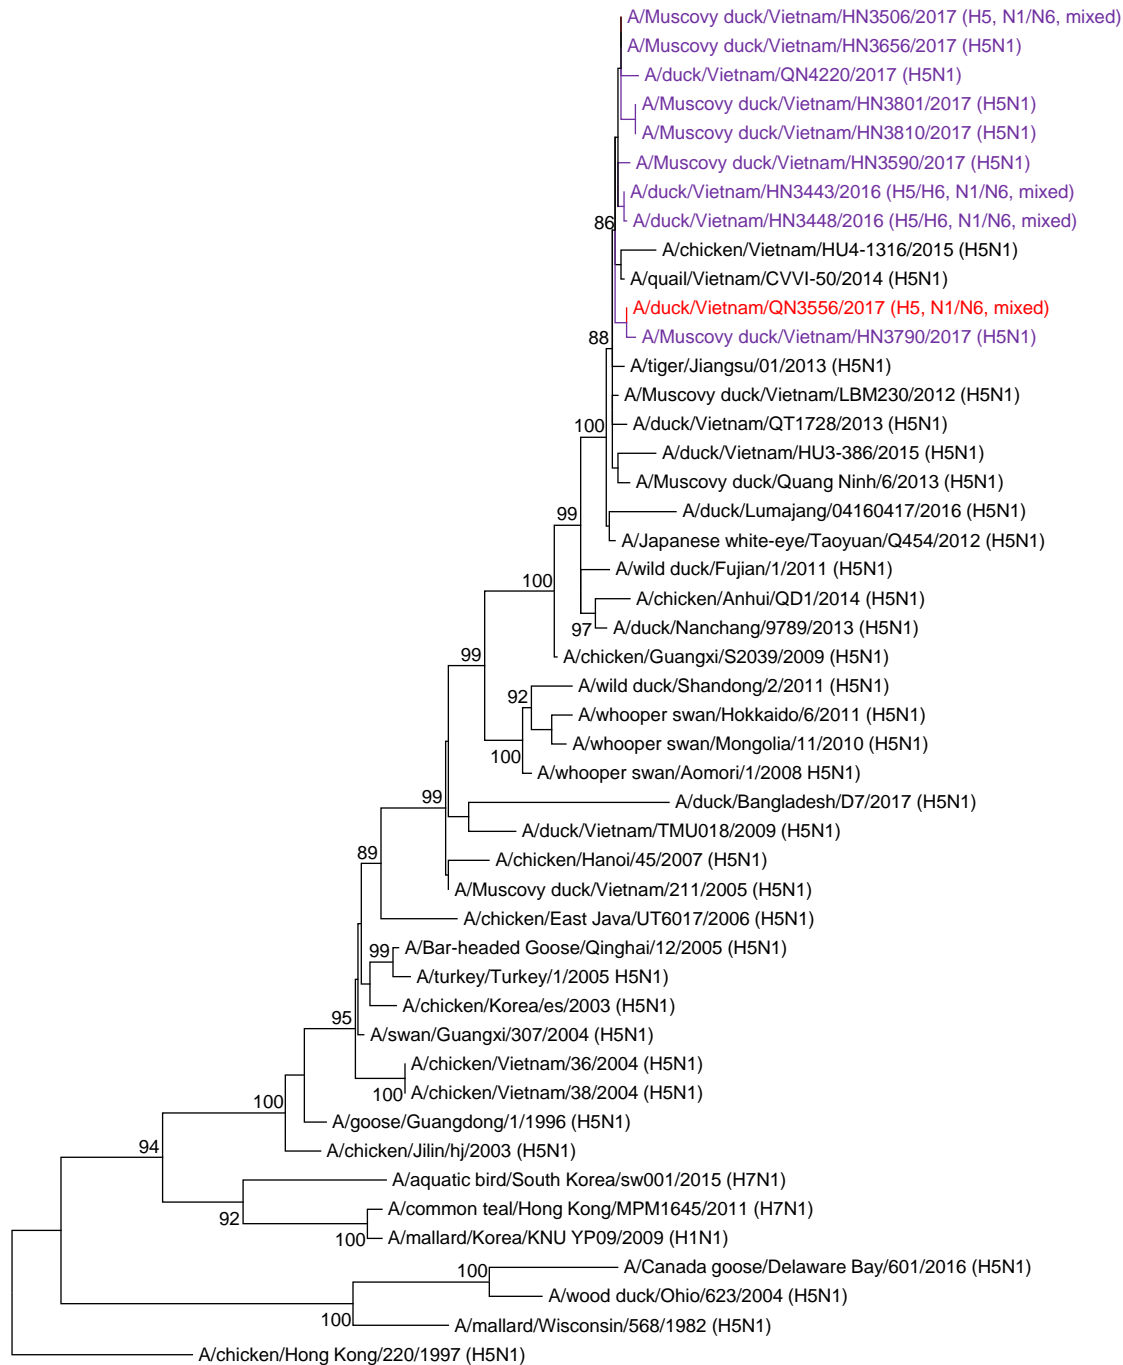

Figure S1. N1 NA gene

Supplement: s1 [file s1]
